# Supplementary material for: SATB1 ensures appropriate transcriptional programs within naïve CD8+ T cells
Source: PubMed Central journal article supplement — Immunol Cell Biol. 2022 Jul 13;100(8):636–52. doi: 10.1111/imcb.12566 (PMC9542893; doi:10.1111/imcb.12566), 2022-07-13
Supplement: IMCB-100-636-s001.pdf [file IMCB-100-636-s001.pdf]

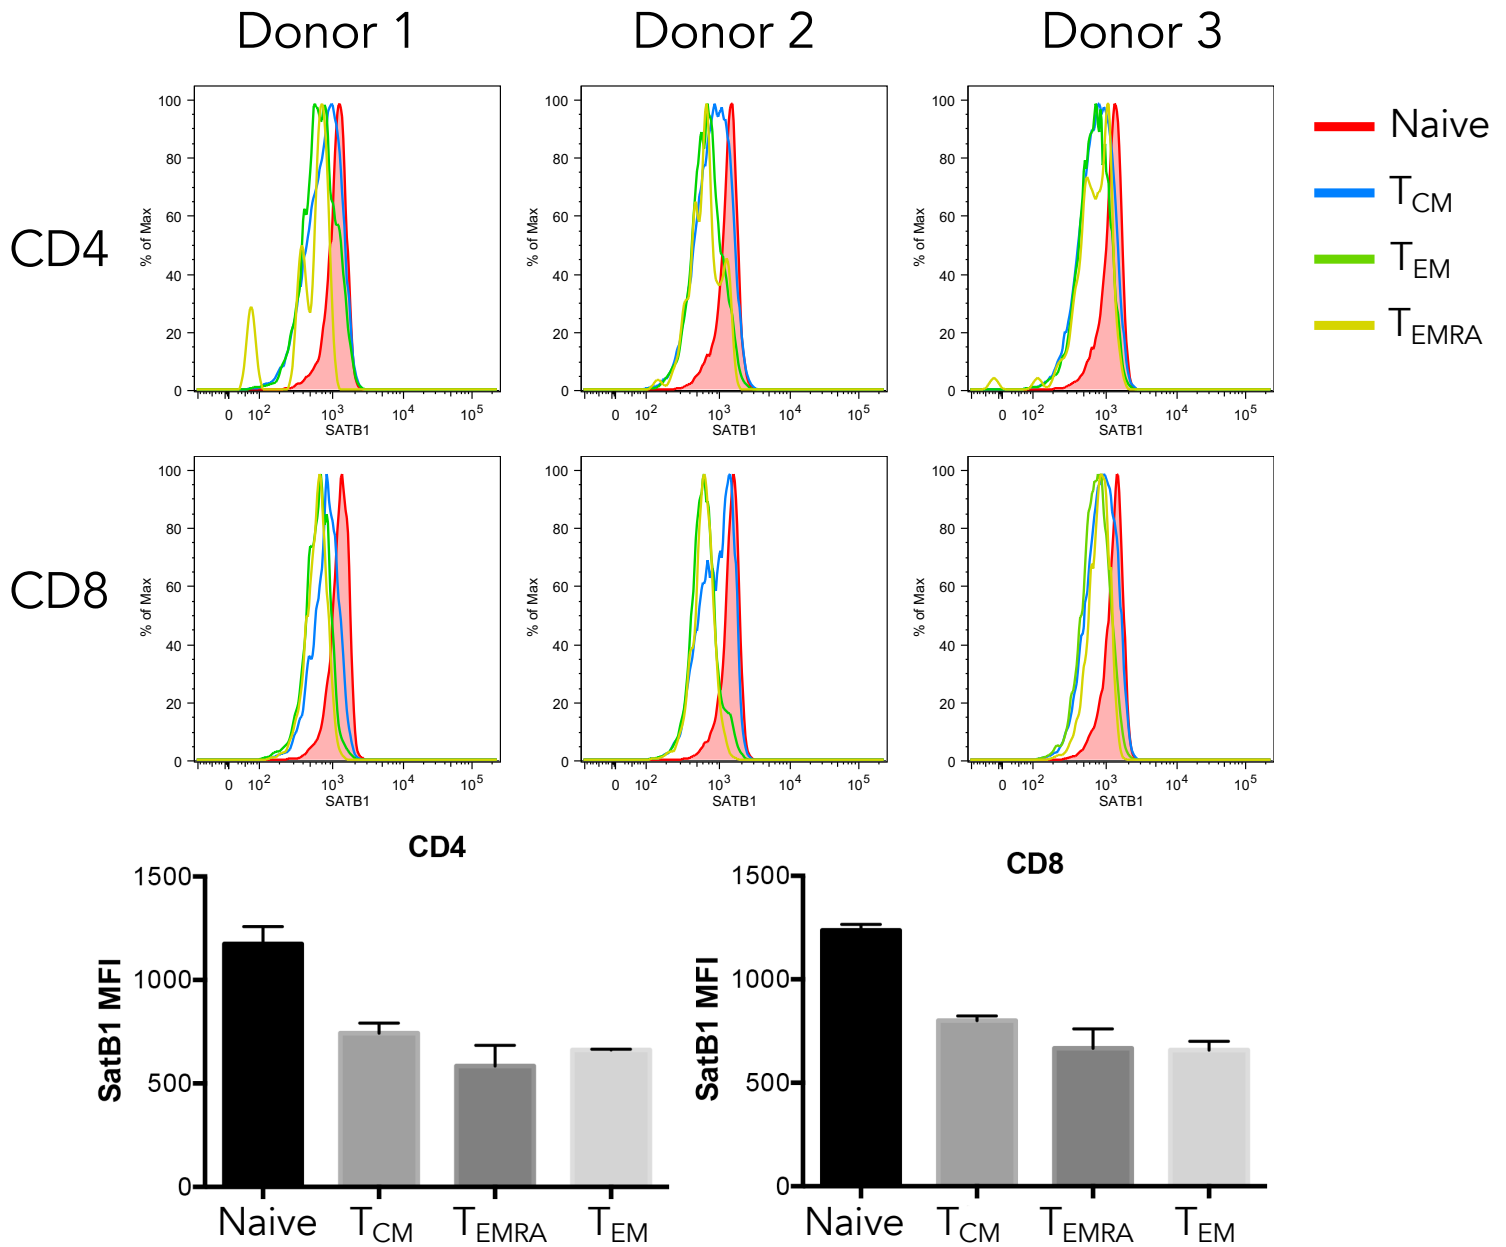

**Supplementary figure 1.** SATB1 expression in human CD8<sup>+</sup> T cell subsets. Human peripheral blood mononuclear cells were immuno-stained for flow cytometry to measure proportions naïve (CD27<sup>+</sup>CD45RA<sup>+</sup>),  $T_{CM}$  (CD27<sup>+</sup>CD45RA<sup>-</sup>), TEMRA (CD27<sup>-</sup>CD45RA<sup>+</sup>) and TEM (CD27<sup>-</sup>CD45RA<sup>-</sup>) CD4<sup>+</sup> and CD8<sup>+</sup> T cells. Shown are representative histograms and SATB1 mean fluorescence intensity.

### A Infection Scheme

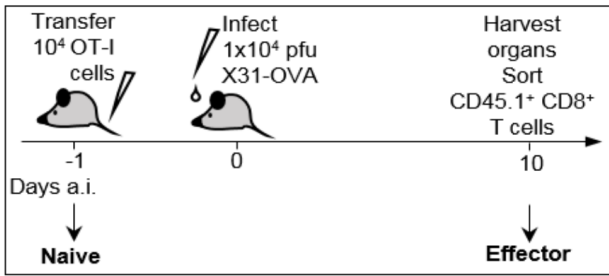

### B

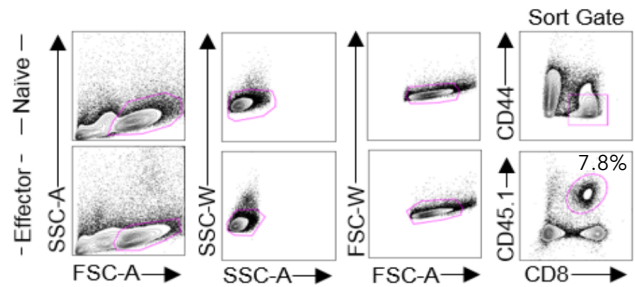

### C Naive

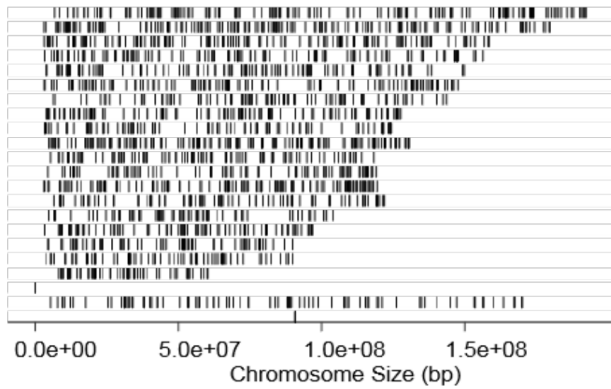

### D Effector

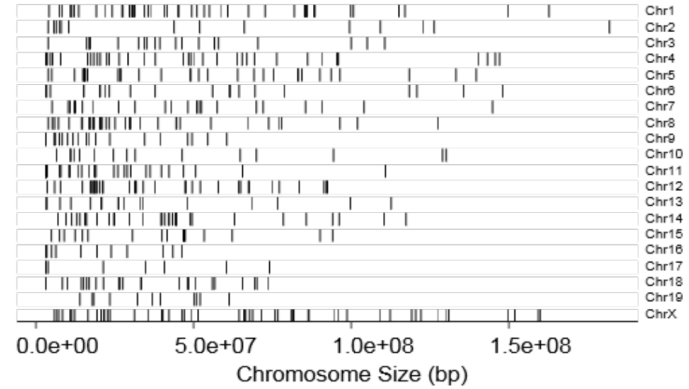

e

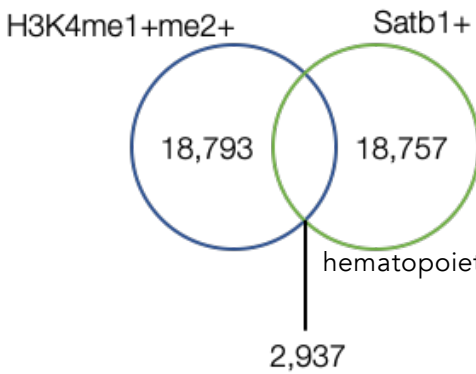

f

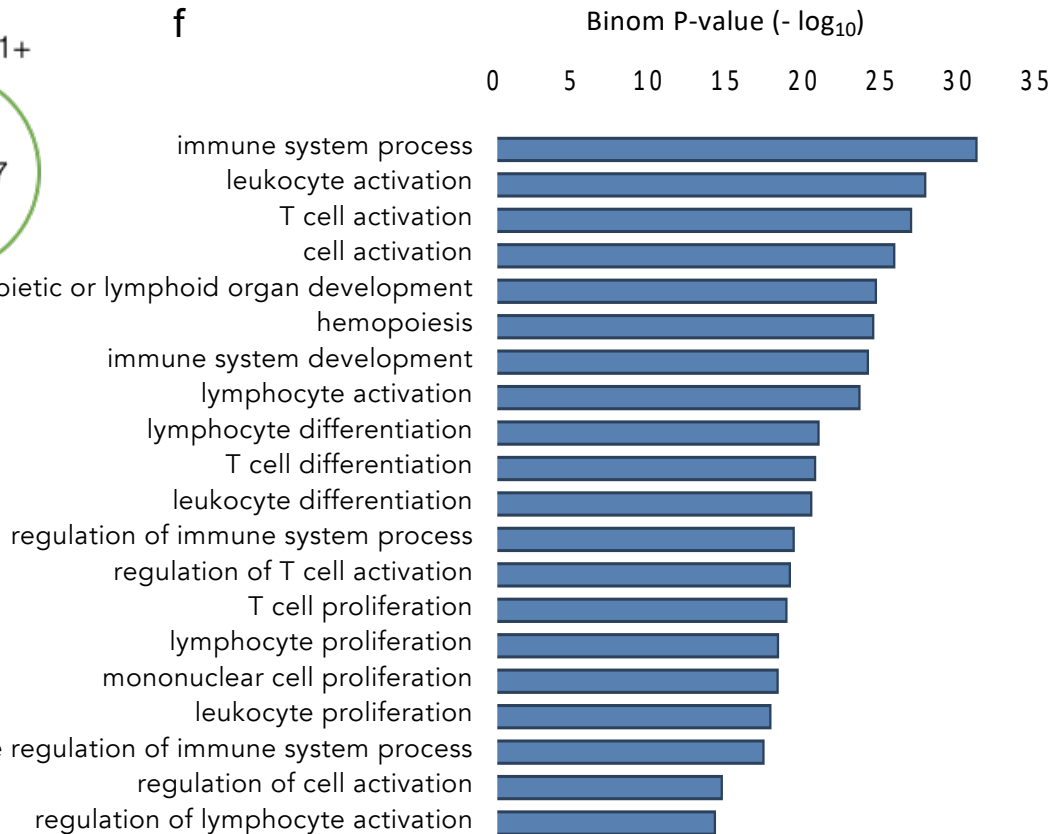

**Supplementary figure 2. SATB1 binding profiles within naïve and effector CD8<sup>+</sup> T cells.** (a) SATB1 ChIP-seq was performed on either naïve (CD44<sup>lo</sup>CD62L<sup>hi</sup>) OTIs or effector OT-I isolated from recipient mice after adoptive transfer and subsequent infection with x31-OVA. (b) Representative sort profiles of naïve CD44<sup>lo</sup>CD8<sup>+</sup> OT-I T cells from spleens of uninfected mice or effector OT-I CD8<sup>+</sup> T cells. (c, d) SATB1 binding sites identified mapped onto individual chromosomes in naïve (c) or (d) effector OT-I CD8<sup>+</sup> T cells using the ChIPseeker R-package. (e) SATB1 binding sites within naïve CD8<sup>+</sup> OTIs was overlaid with naïve OT-I CD8<sup>+</sup> H3K4me1 and H3K4me2 ChIP seq data (Russ *et al*, 2017). Shown is the number of peaks that overlap. (f) Gene ontology analysis was performed on the nearest neighboring genes to SATB1 binding peaks observed in naïve CD8<sup>+</sup> OT-Is. Biological pathways are ranked according to -log<sub>10</sub> p-values using the GREAT (3.0) software.

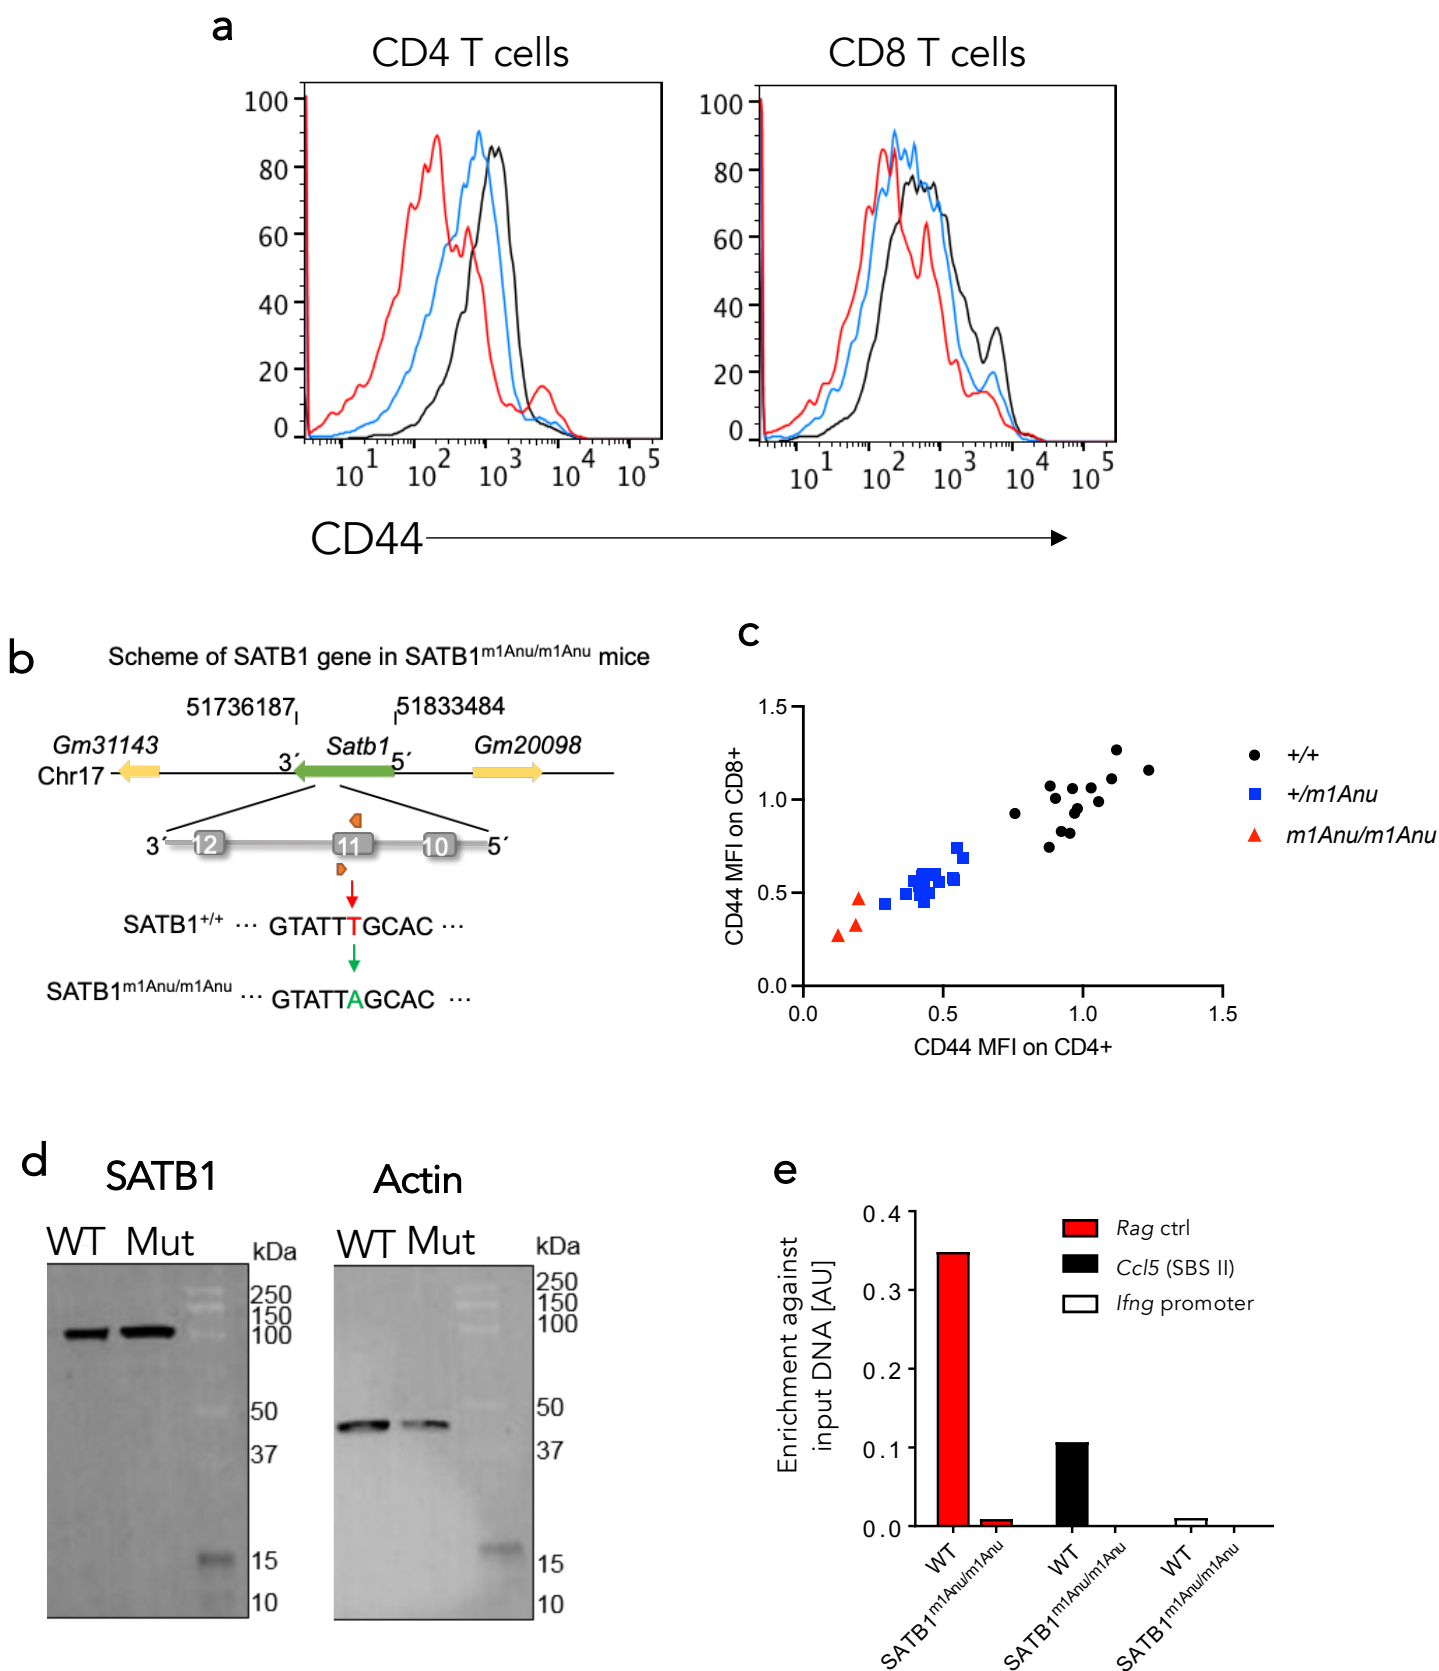

**Supplementary figure 3.** Identification and characterization of SATB1<sup>m1Anu</sup> mice. **(a)** representative histograms showing CD44 expression on naïve CD4<sup>+</sup> T cells. **(b)** Identification of the point mutation in exon 11 of the SATB1 gene (T->A mutation) after ENU mutagenesis. **(c)** Quantitation of CD44 expression on WT, heterozygous and homozygous mice. **(d)** Western blot of SATB1 and beta-ACTIN from same samples after loading 10 µg of protein from thymocytes from WT and SATB1<sup>m1Anu/m1Anu</sup> (Mut) mice. **(e)** SATB1 ChIP was performed on SATB1 binding sites predicted from the ChIP-seq data that included a region distal to *Rag* locus, a binding site upstream of *Ccl5* locus and a negative control within the IFN $\gamma$  promoter that showed no evidence of SATB1 binding.

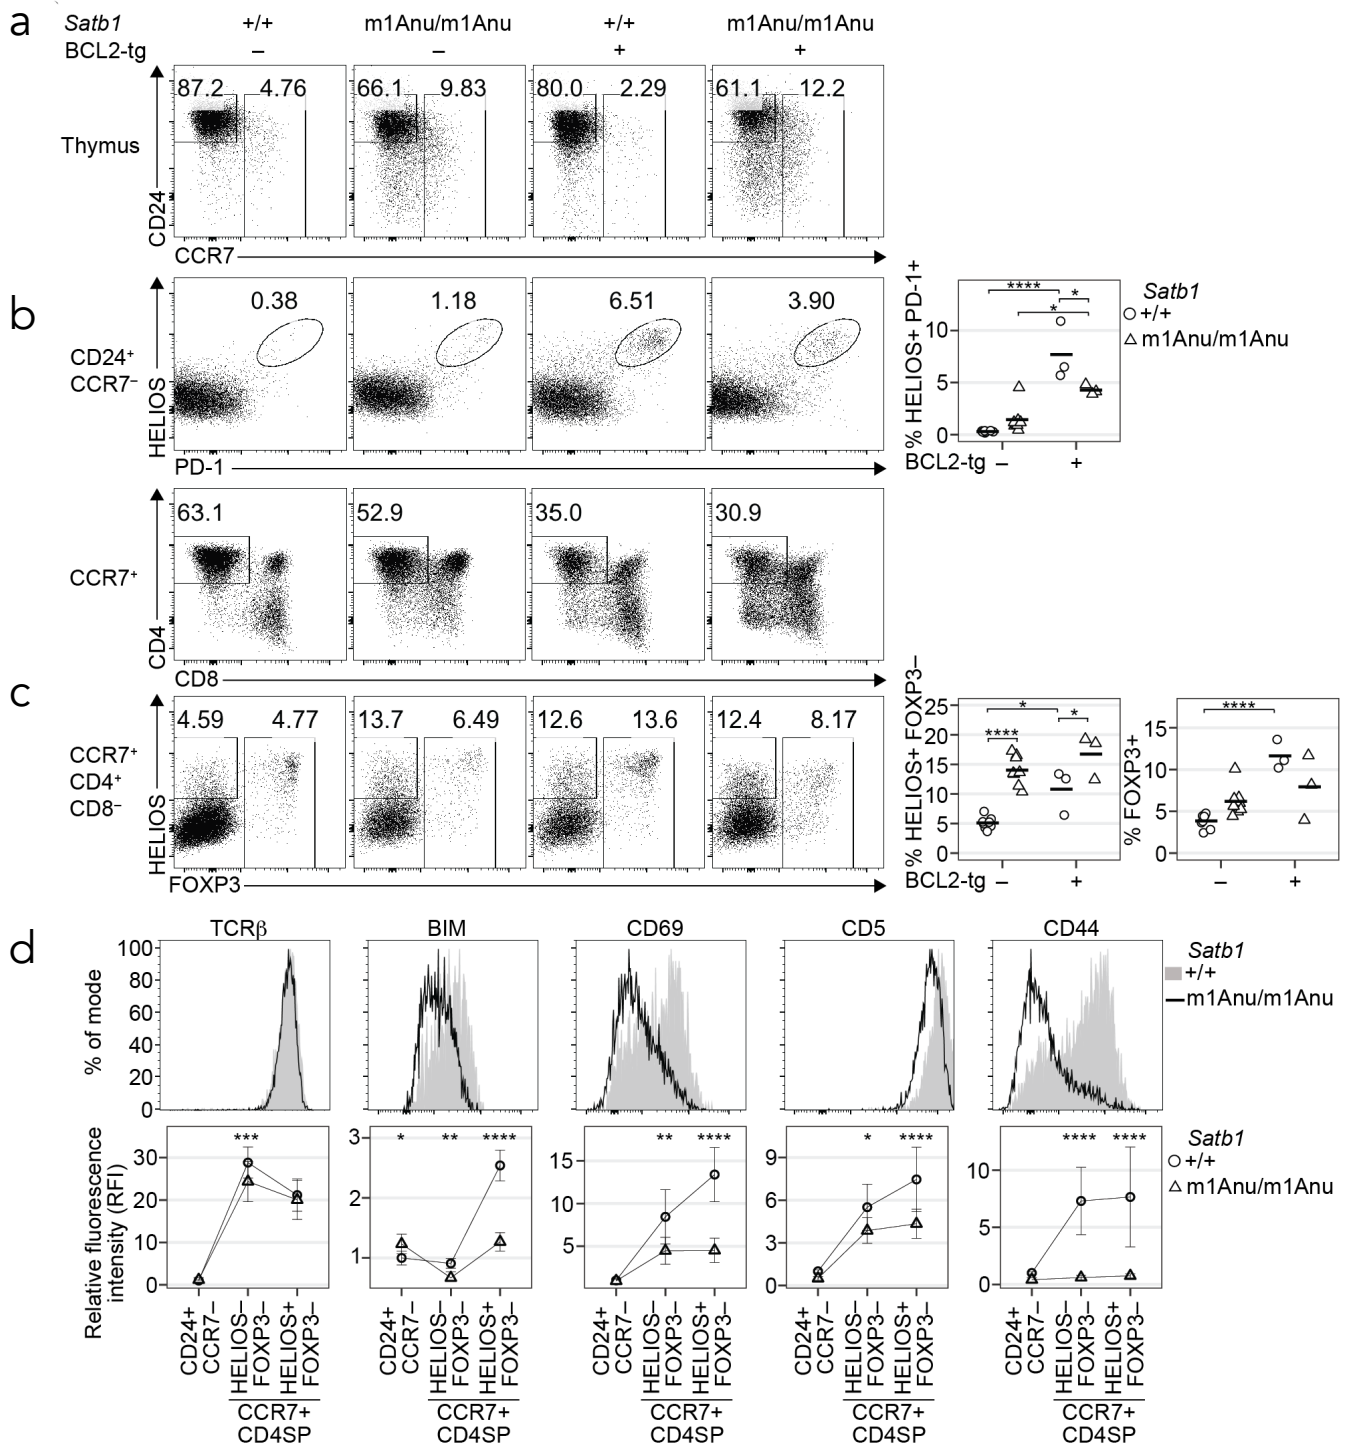

**Supplementary figure 4. Perturbation of thymic selection within *SATB1*<sup>m1Anu/m1Anu</sup> thymocytes.** (a) CD24/CCR7 and CD4/CD8 phenotype of thymocytes from mice with the indicated genotypes (top) with a gate for the CD24<sup>+</sup> CCR7 population. (b) Analysis of CD24<sup>+</sup>/CCR7<sup>+</sup> thymocytes were analysed for Helios and PD-1 expression to enumerate the Helios<sup>+</sup> PD-1<sup>+</sup> subset (right). (c) CD4<sup>+</sup>/CCR7<sup>+</sup> phenotype of CCR7<sup>+</sup> thymocytes, with a gate for the CD4SP population, analysed for Helios and Foxp3 expression to enumerate the Helios<sup>+</sup> Foxp3 and Foxp3<sup>+</sup> subsets (right). (d) Histogram overlays show TCRβ, BIM, CD69, CD5 and CD44 within CD24<sup>+</sup>/CCR7<sup>+</sup> CD4SP HELIOS<sup>+</sup> subsets. Graphs (below) show relative fluorescence intensities (RFI) of TCRβ, BIM, CD69, CD5 and CD44 within CCR7<sup>+</sup>CD4SP thymocytes subsets of in concatenated FACS files from a single experiment. Circles represent WT mice (*SATB1*<sup>+/+</sup>) and triangles represent *SATB1*<sup>m1Anu/m1Anu</sup> mice. Statistical analyses used 2-way ANOVA with Sidak's multiple comparisons test. *P*-values: \* *P* < 0.05, \*\* *P* < 0.01, \*\*\* *P* < 0.001 and \*\*\*\* *P* < 0.0001.

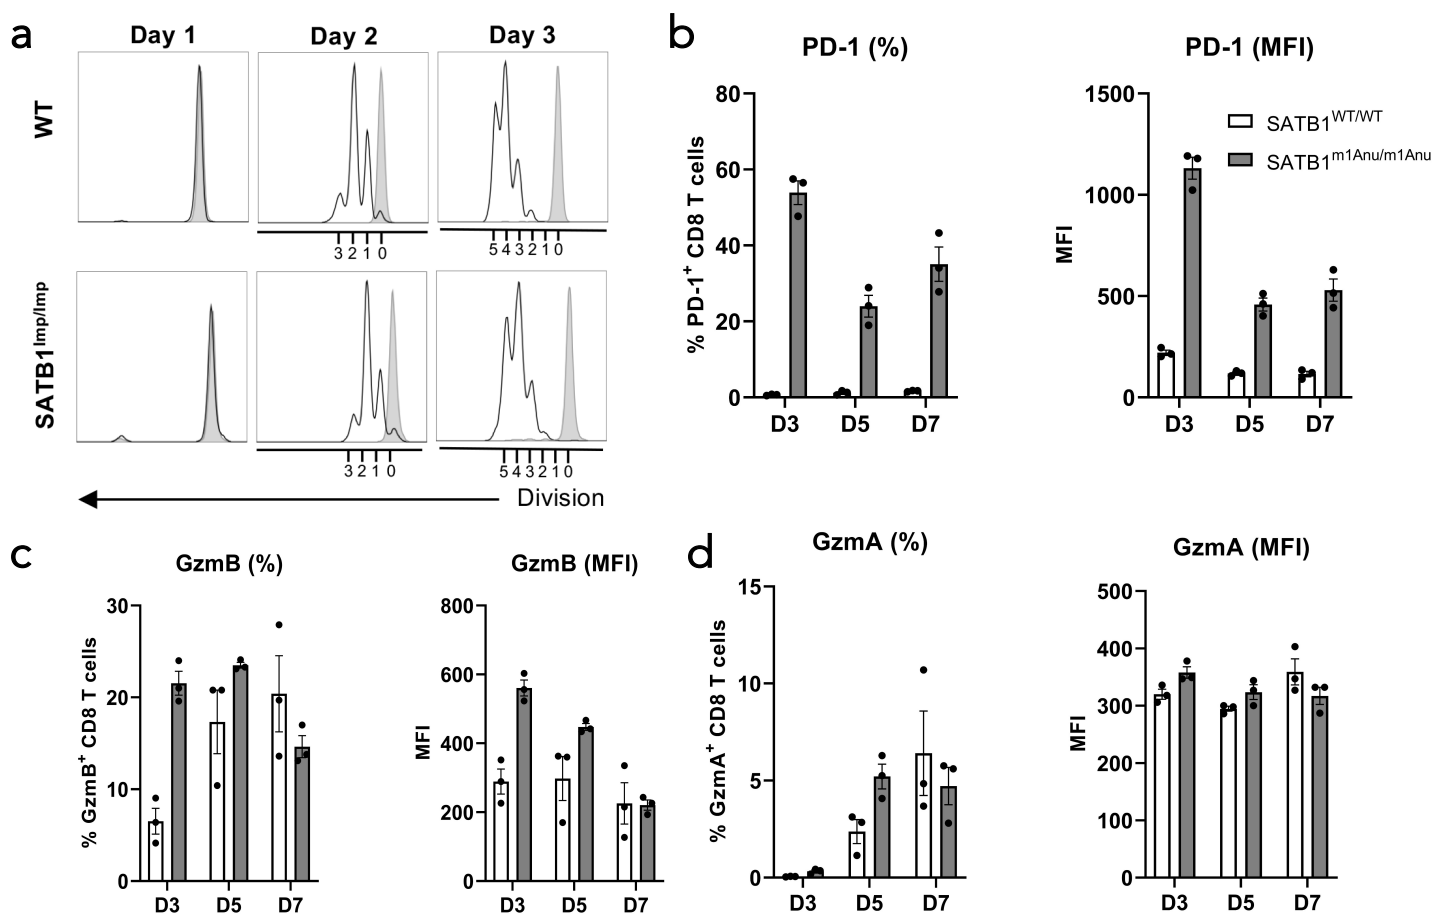

**Supplementary figure 5. Increased effector marker expression after activation of *SATB1*<sup>m1Anu/m1Anu</sup> CD8<sup>+</sup> T cells.** (a) Naïve (CD44<sup>lo</sup>CD62L<sup>hi</sup>) CD8<sup>+</sup> T cells from WT or *SATB1*<sup>m1Anu/m1Anu</sup> mice were sort purified and stained with Cell Trace Violet. Cells were then stimulated *in vitro* with  $\alpha$ CD3/ $\alpha$ CD8 (unshaded histogram) and the extent of cell division examined on days 1, 2 and 3 after activation. Unstimulated controls are shown as an overlay (shaded histogram). Activated WT (white bars) or *SATB1*<sup>m1Anu/m1Anu</sup> CD8<sup>+</sup> T cells were stained for PD-1 (b), GzmB (c) or Gzm (d) on days 3, 5 and 7 after activation and proportion and mean fluorescence intensity (MFI) determined. Shown are biological replicates. Statistical analyses used 2-way ANOVA with Sidak's multiple comparisons test. *P*-values: \* *P* < 0.05, n = 3 mice per group; representative of two independent experiments.

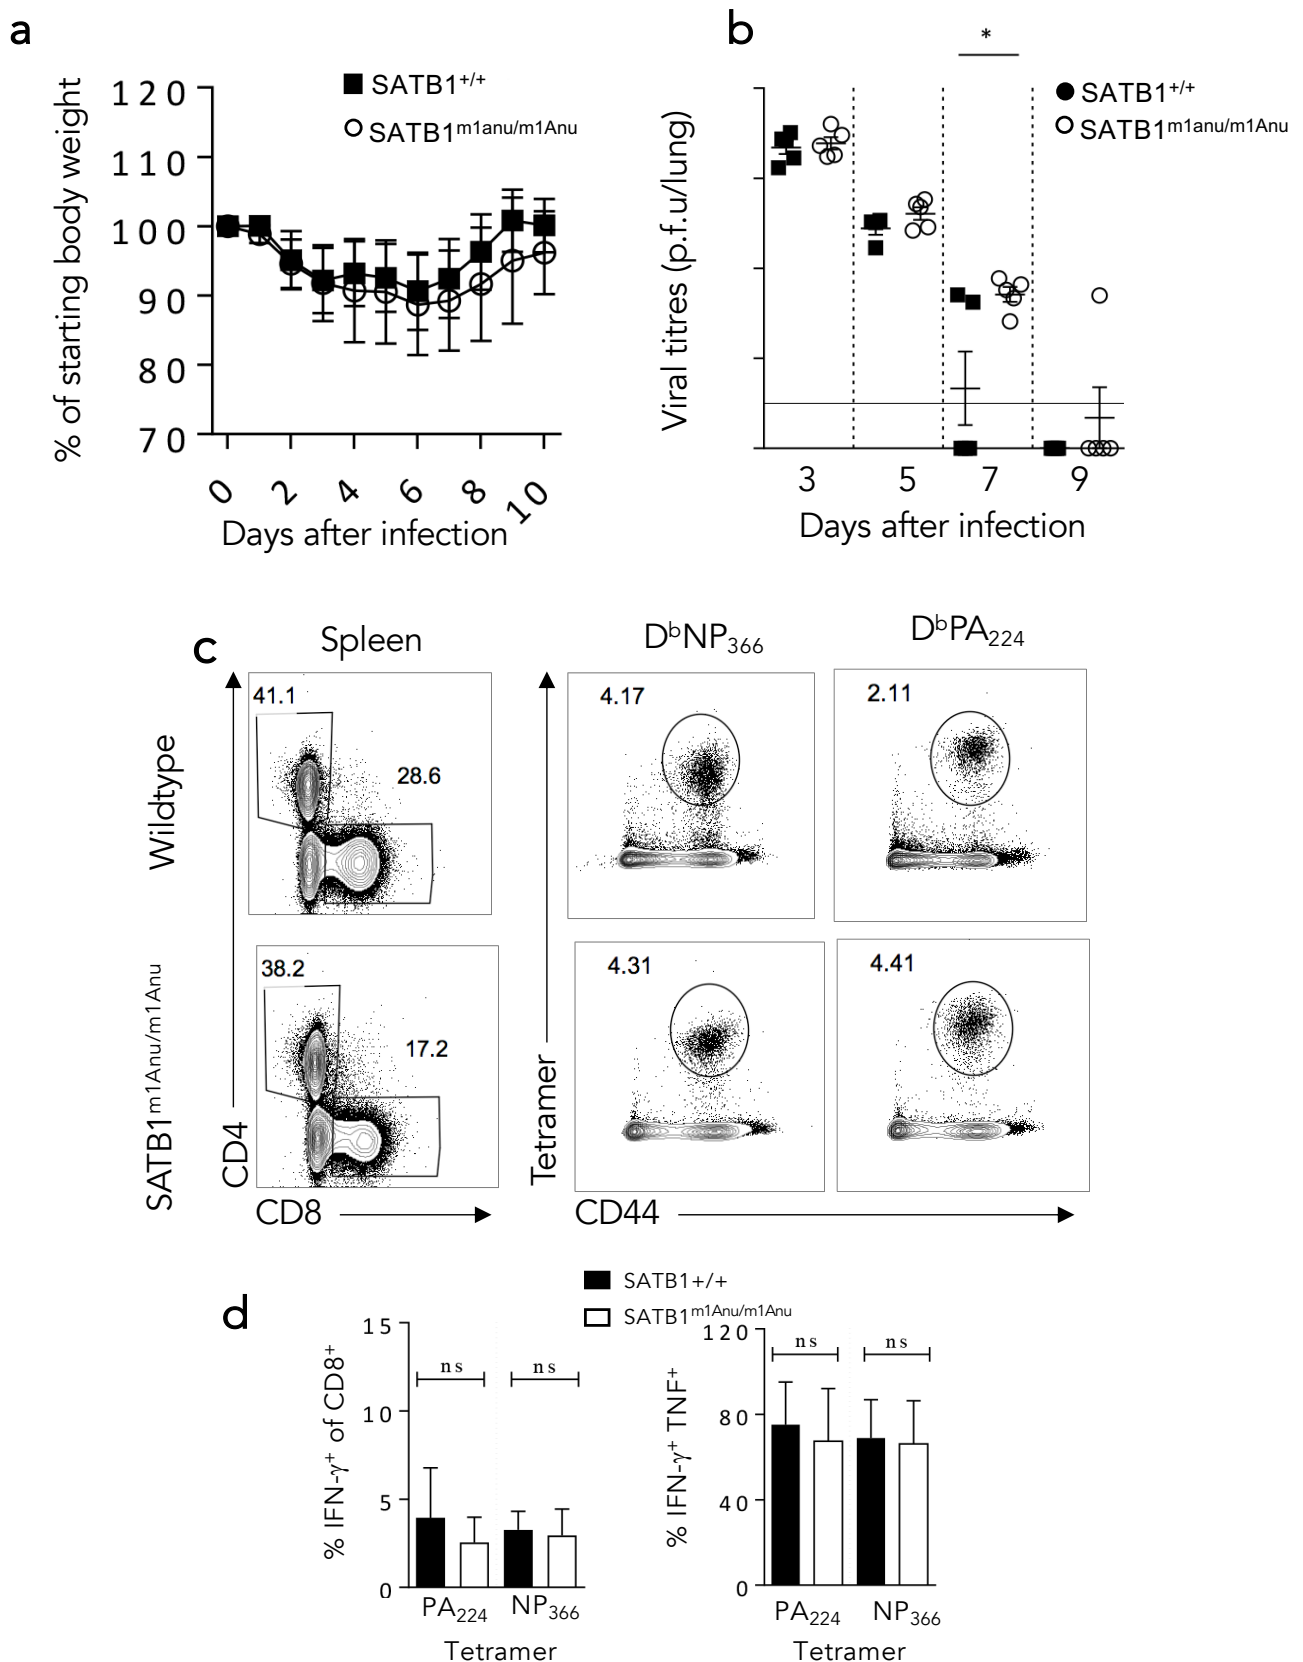

**Supplementary figure 6. Delayed viral clearance in IAV infected *SATB1*<sup>m1Anu/m1Anu</sup> mice and induction of CD8<sup>+</sup> T cell responses.** (a) Both WT (*SATB1*<sup>+/+</sup>) and *SATB1*<sup>m1Anu/m1Anu</sup> mice were infected intranasally with 10<sup>3</sup> p.f.u of A/HKx31 virus. Weight loss (% starting body weight) was measured at various times points after infection. (b) IAV viral titres were determined by plaque assay from perfused lungs from A/HKx31 infected WT and *SATB1*<sup>m1Anu/m1Anu</sup> mice. (c) Splenocytes were isolated from WT or *SATB1*<sup>m1Anu/m1Anu</sup> mice 10 days after infection and stained with CD8 and either D<sup>b</sup>NP<sub>366</sub> or D<sup>b</sup>PA<sub>224</sub> tetramers. Shown are representative FACS plots. (d) Cytokine production of D<sup>b</sup>PA<sub>224</sub> and D<sup>b</sup>NP<sub>366</sub>-specific CD8<sup>+</sup> T cell isolated from the infected lung were assessed by intracellular cytokine staining 5 hours after *in vitro* stimulation with 1 μg of PA<sub>224</sub> or NP<sub>366</sub> peptide 10 days after infection.

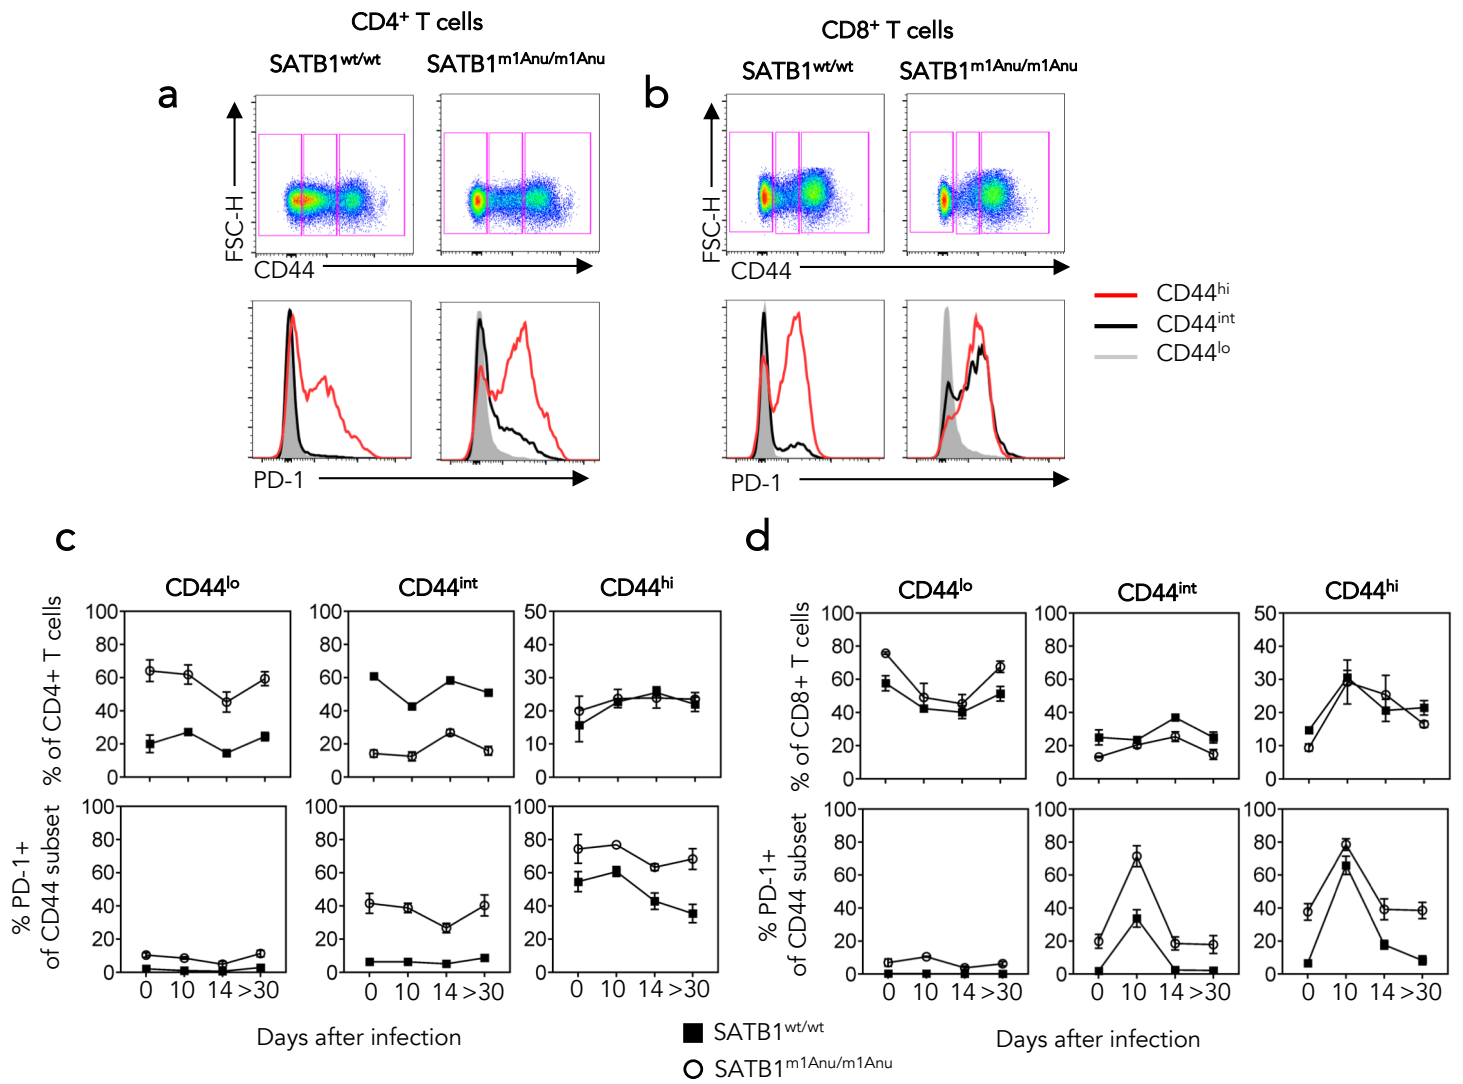

**Supplementary figure 7. Higher baseline expression levels of PD-1 in SATB1<sup>m1Anu/m1Anu</sup> T cells.**

(a, b) Representative flow cytometry plots and histograms showing CD44 expression on CD4<sup>+</sup> (a) and CD8<sup>+</sup> (b) T cell populations from uninfected WT or SATB1<sup>m1Anu/m1Anu</sup> populations and subsequent PD-1 expression on CD44 subsets (histograms). (c, d) The proportion of CD4<sup>+</sup> (c), or CD8<sup>+</sup> (d) T cells within each CD44 subset (top row) and the PD-1 expression within CD44 subsets (bottom row) isolated from uninfected mice, or at the indicated times after IAV infection (*x*-axis). Error bars show mean  $\pm$  SD of *n* = 2–5 mice per group, timepoint and surface staining from 2 or 3 independent experiments.

a

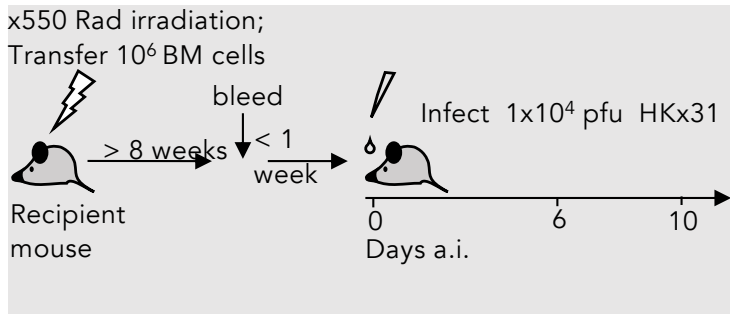

b

|    | Recipient (congenic marker)    | Donor 1 (congenic marker)      | Donor 2 (congenic marker)      | x-axis labeling                                           |
|----|--------------------------------|--------------------------------|--------------------------------|-----------------------------------------------------------|
| 1) | WT (CD45.1)                    | WT (CD45.2)                    | -                              | $WT_{45.2}$                                               |
| 2) | WT (CD45.1)                    | $SATB1^{m1Anu/m1Anu}$ (CD45.2) | -                              | $SATB1^{m1Anu/m1Anu}$                                     |
| 3) | $SATB1^{m1Anu/m1Anu}$ (CD45.2) | WT (CD45.1)                    | -                              | $WT_{45.1}$                                               |
| 4) | WT (CD45.1)                    | WT (CD45.1/2)                  | $SATB1^{m1Anu/m1Anu}$ (CD45.2) | Mixed chimera:<br>$WT_{mix}$ and<br>$SATB1^{m1Anu/m1Anu}$ |

c

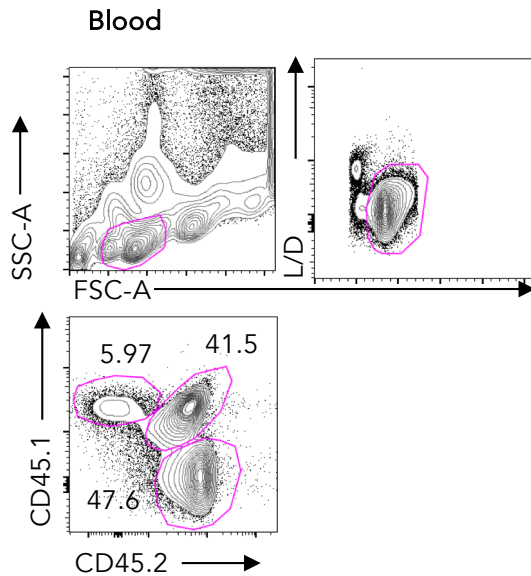

d

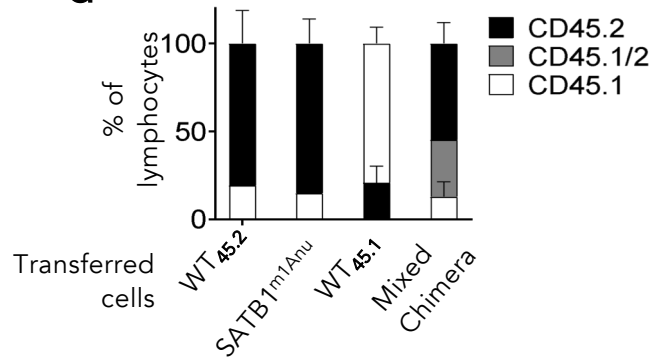

e

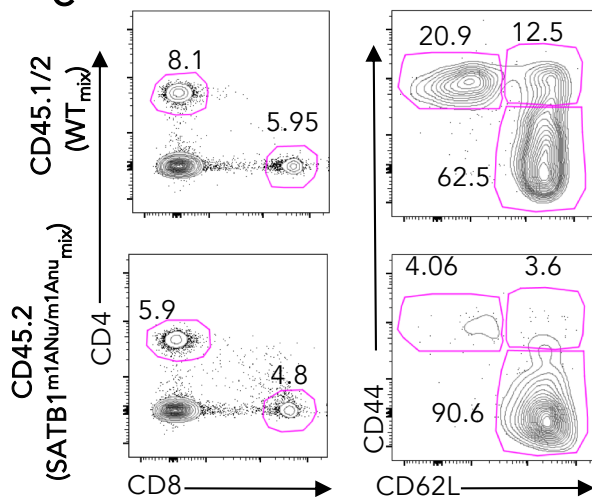

f

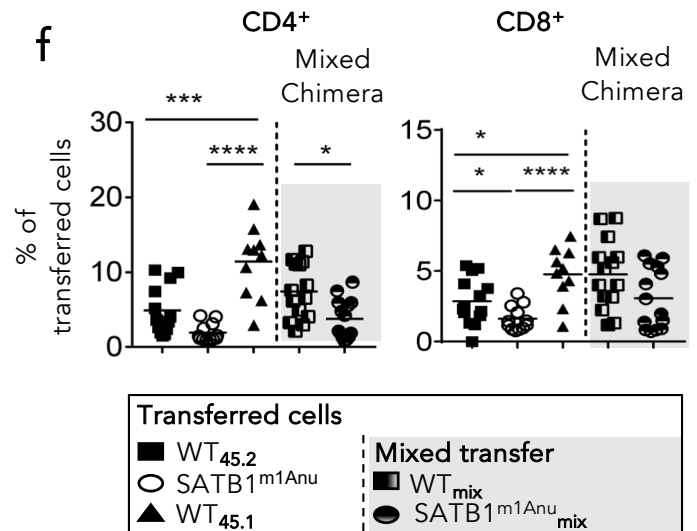

**Supplementary figure 8. Generation of  $SATB1^{m1Anu/m1Anu}$  and WT reconstituted bone marrow chimeras.** (a) Scheme of irradiation, bleeding and infection of different bone marrow chimera groups. (b) Table showing the different bone marrow cell transfers into recipient mice for respective generated bone marrow chimera groups. (c-d) Representative FACS plots and quantitation of the proportions of donor bone marrow from blood of mixed chimeras. (e-f) Representative FACS plots and the percentage of CD4<sup>+</sup> and CD8<sup>+</sup> T cells in blood of different bone marrow chimera groups > 8 weeks after irradiation and bone marrow transfer. 5 - 8 mice per bm group, representative of 3 independent experiments. Unpaired Students *t*-test analysis (*P*-value \*  $P \leq 0.05$ ; \*\*  $P \leq 0.01$ , \*\*\*  $P \leq 0.001$ , \*\*\*\*  $P \leq 0.0001$ ).
